# Supplementary material for: Animal Health in Compost-Bedded Pack and Cubicle Dairy Barns in Six European Countries
Source: MDPI journal article supplement (doi:10.3390/ani12030396), 2022-02-07
Supplement: s1 [file s1]

Table S1. Parameter estimates (Est.) with standard errors (SE) and overall significance tests of main effects from multivariable (mixed) regression models on health traits ( $\log_{10}$  somatic cell counts [SCC,  $\log_{10}$ SCC], high SCC [HiSCC], new HiSCC [IncSCC], risk of ketosis [KETO]).

| Effect              |                     | Log <sub>10</sub> SCC |      |                                  | HiSCC |      |                               | IncSCC |      |                                  | KETO  |      |                                  |
|---------------------|---------------------|-----------------------|------|----------------------------------|-------|------|-------------------------------|--------|------|----------------------------------|-------|------|----------------------------------|
|                     |                     | Est.                  | SE   | P-value<br>for<br>main<br>effect | Est.  | SE   | P-value<br>for main<br>effect | Est.   | SE   | P-value<br>for<br>main<br>effect | Est.  | SE   | P-value<br>for<br>main<br>effect |
| Intercept           |                     | 2.02                  | 0.03 |                                  | -1.22 | 0.17 |                               | -2.12  | 0.80 |                                  | -1.36 | 0.26 |                                  |
| Pair                | 1                   | -0.15                 | 0.03 | <0.0001                          | -0.23 | 0.15 | <0.0001                       | -0.37  | 0.14 | <0.0001                          | 0.17  | 0.22 | <0.0001                          |
|                     | 2                   | -0.29                 | 0.03 |                                  | -0.87 | 0.14 |                               | -0.93  | 0.13 |                                  | 0.60  | 0.20 |                                  |
|                     | 3                   | -0.14                 | 0.03 |                                  | -0.46 | 0.15 |                               | -0.83  | 0.14 |                                  | 0.15  | 0.22 |                                  |
|                     | 4                   | -0.23                 | 0.03 |                                  | -0.85 | 0.15 |                               | -1.09  | 0.14 |                                  | 0.34  | 0.20 |                                  |
|                     | 5                   | -0.34                 | 0.03 |                                  | -1.02 | 0.15 |                               | -0.92  | 0.14 |                                  | -0.29 | 0.22 |                                  |
|                     | 6                   | -0.07                 | 0.03 |                                  | -0.09 | 0.14 |                               | -0.26  | 0.13 |                                  | 0.28  | 0.20 |                                  |
|                     | 7                   | 0.00                  |      |                                  | 0.00  |      |                               | 0.00   |      |                                  | 0.00  |      |                                  |
|                     | 11                  | 0.21                  | 0.03 |                                  | 0.77  | 0.14 |                               | 0.57   | 0.13 |                                  | 0.54  | 0.21 |                                  |
|                     | 12                  | -0.07                 | 0.04 |                                  | -0.36 | 0.18 |                               | -0.39  | 0.16 |                                  | -1.17 | 0.31 |                                  |
|                     | 14                  | -0.07                 | 0.04 |                                  | 0.17  | 0.16 |                               | -0.18  | 0.15 |                                  | 1.26  | 0.21 |                                  |
|                     | 15                  | -0.08                 | 0.04 |                                  | -0.19 | 0.17 |                               | -0.30  | 0.16 |                                  | -0.25 | 0.27 |                                  |
|                     | 16                  | -0.58                 | 0.05 |                                  | -2.05 | 0.26 |                               | -2.18  | 0.27 |                                  | -0.26 | 0.30 |                                  |
|                     | 17                  | -0.20                 | 0.05 |                                  | -0.59 | 0.25 |                               | -0.52  | 0.23 |                                  | 0.49  | 0.31 |                                  |
|                     | 18                  | -0.16                 | 0.04 |                                  | -0.39 | 0.18 |                               | -0.10  | 0.16 |                                  | -0.04 | 0.25 |                                  |
|                     | 19                  | -0.15                 | 0.04 |                                  | -0.34 | 0.17 |                               | -0.76  | 0.16 |                                  | 1.28  | 0.21 |                                  |
|                     | 20                  | 0.13                  | 0.04 |                                  | 0.33  | 0.15 |                               | 0.08   | 0.14 |                                  | 0.20  | 0.22 |                                  |
| Housing system      | Compost-bedded pack | 0.11                  | 0.01 | <0.0001                          | 0.46  | 0.05 | <0.0001                       | 0.44   | 0.05 | <0.0001                          | -0.05 | 0.07 | 0.44                             |
|                     | Cubicle             | 0.00                  |      |                                  | 0.00  |      |                               | 0.00   |      |                                  | 0.00  |      |                                  |
| Month in milk class | 1                   | 0.00                  |      |                                  | 0.00  |      |                               | 0.00   |      |                                  |       |      |                                  |
|                     | 2                   | -0.15                 | 0.01 | <0.0001                          | -0.36 | 0.06 | <0.0001                       | 0.27   | 0.78 | <0.0001                          | -0.80 | 0.06 | <0.0001                          |

|                       |          |    |       |      |         |       |      |         |       |      |         |       |      |         |
|-----------------------|----------|----|-------|------|---------|-------|------|---------|-------|------|---------|-------|------|---------|
|                       |          | 3  | -0.12 | 0.01 |         | -0.33 | 0.06 |         | 0.25  | 0.78 |         | -1.12 | 0.10 |         |
|                       |          | 4  | -0.08 | 0.01 |         | -0.26 | 0.06 |         | 0.25  | 0.78 |         | 0.00  | .    |         |
|                       |          | 5  | -0.04 | 0.01 |         | -0.17 | 0.06 |         | 0.33  | 0.78 |         |       |      |         |
|                       |          | 6  | -0.01 | 0.01 |         | -0.11 | 0.06 |         | 0.34  | 0.78 |         |       |      |         |
|                       |          | 7  | 0.04  | 0.01 |         | 0.03  | 0.06 |         | 0.46  | 0.78 |         |       |      |         |
|                       |          | 8  | 0.08  | 0.01 |         | 0.16  | 0.06 |         | 0.61  | 0.78 |         |       |      |         |
|                       |          | 9  | 0.11  | 0.01 |         | 0.19  | 0.06 |         | 0.55  | 0.78 |         |       |      |         |
|                       |          | 10 | 0.15  | 0.01 |         | 0.36  | 0.06 |         | 0.77  | 0.78 |         |       |      |         |
|                       |          | 11 | 0.19  | 0.01 |         | 0.31  | 0.07 |         | 0.70  | 0.78 |         |       |      |         |
|                       |          | 12 | 0.20  | 0.01 |         | 0.29  | 0.08 |         | 0.79  | 0.78 |         |       |      |         |
|                       |          | 13 | 0.25  | 0.03 |         | 0.30  | 0.17 |         | 0.81  | 0.81 |         |       |      |         |
| Parity                |          | 1  | -0.23 | 0.01 | <0.0001 | -0.75 | 0.05 | <0.0001 | -0.58 | 0.05 | <0.0001 | -0.39 | 0.08 | <0.0001 |
|                       |          | 2  | -0.11 | 0.01 |         | -0.53 | 0.04 |         | -0.42 | 0.05 |         | -0.46 | 0.08 |         |
|                       |          | ≥3 | 0.00  | .    |         | 0.00  | .    |         | 0.00  | .    |         | 0.00  | .    |         |
| Breed                 | Holstein |    | 0.04  | 0.02 | <0.01   | 0.19  | 0.07 | 0.01    | 0.15  | 0.07 | 0.03    | -0.17 | 0.10 | 0.09    |
|                       | Other    |    | 0.00  | .    |         | 0.00  | .    |         | 0.00  | .    |         | 0.00  | .    |         |
| Year-month<br>of test | 201701   |    | -0.01 | 0.02 | <0.01   | -0.02 | 0.10 | <0.001  | -0.11 | 0.14 | 0.56    | 0.27  | 0.20 | <0.0001 |
|                       | 201702   |    | -0.01 | 0.02 |         | 0.06  | 0.10 |         | 0.07  | 0.14 |         | -0.03 | 0.22 |         |
|                       | 201703   |    | -0.03 | 0.02 |         | -0.03 | 0.09 |         | -0.14 | 0.14 |         | 0.17  | 0.21 |         |
|                       | 201704   |    | -0.03 | 0.02 |         | -0.08 | 0.10 |         | -0.06 | 0.14 |         | 0.34  | 0.22 |         |
|                       | 201705   |    | -0.04 | 0.02 |         | -0.14 | 0.10 |         | -0.03 | 0.13 |         | -0.11 | 0.22 |         |
|                       | 201706   |    | 0.00  | 0.02 |         | 0.17  | 0.10 |         | 0.10  | 0.14 |         | 0.03  | 0.23 |         |
|                       | 201707   |    | 0.00  | 0.02 |         | 0.00  | 0.10 |         | -0.12 | 0.14 |         | 0.18  | 0.23 |         |
|                       | 201708   |    | 0.00  | 0.02 |         | 0.07  | 0.10 |         | 0.13  | 0.14 |         | 0.25  | 0.21 |         |
|                       | 201709   |    | -0.01 | 0.02 |         | -0.11 | 0.10 |         | 0.10  | 0.14 |         | -0.14 | 0.22 |         |
|                       | 201710   |    | -0.03 | 0.02 |         | -0.12 | 0.10 |         | -0.05 | 0.14 |         | -0.17 | 0.22 |         |
|                       | 201711   |    | 0.00  | 0.02 |         | 0.05  | 0.10 |         | 0.11  | 0.14 |         | -0.58 | 0.23 |         |

|        |       |      |       |      |       |      |       |      |
|--------|-------|------|-------|------|-------|------|-------|------|
| 201712 | -0.02 | 0.02 | -0.14 | 0.10 | -0.05 | 0.14 | 0.01  | 0.21 |
| 201801 | -0.02 | 0.02 | -0.04 | 0.09 | 0.01  | 0.14 | 0.22  | 0.21 |
| 201802 | -0.01 | 0.02 | -0.15 | 0.11 | 0.04  | 0.15 | 0.13  | 0.24 |
| 201803 | -0.01 | 0.02 | -0.08 | 0.10 | 0.07  | 0.14 | 0.32  | 0.21 |
| 201804 | 0.00  | 0.02 | 0.01  | 0.10 | 0.05  | 0.14 | 0.36  | 0.21 |
| 201805 | -0.01 | 0.02 | -0.11 | 0.10 | -0.12 | 0.15 | -0.24 | 0.25 |
| 201806 | 0.00  | 0.02 | 0.08  | 0.10 | -0.01 | 0.14 | -0.46 | 0.24 |
| 201807 | 0.03  | 0.02 | 0.17  | 0.09 | 0.11  | 0.14 | -0.05 | 0.22 |
| 201808 | -0.01 | 0.02 | 0.15  | 0.10 | 0.13  | 0.14 | -0.20 | 0.23 |
| 201809 | -0.01 | 0.02 | 0.09  | 0.10 | -0.05 | 0.14 | 0.21  | 0.21 |
| 201810 | -0.01 | 0.02 | 0.05  | 0.10 | 0.02  | 0.14 | -0.38 | 0.22 |
| 201811 | -0.02 | 0.02 | -0.07 | 0.10 | -0.14 | 0.14 | -0.02 | 0.21 |
| 201812 | 0.00  | .    | 0.00  | .    | 0.00  | .    | 0.00  | .    |

---

Table S2. Parameter estimates (Est.) with standard errors (SE) and overall significance tests of main effects from multivariable (mixed) regression models of health traits (prolonged calving intervals [longCI], dystocia [DYST], stillbirth [STBTH]).

| Effect            |                         | longCI |      |                                  | DYST  |      |                               | STBTH |      |                                  |
|-------------------|-------------------------|--------|------|----------------------------------|-------|------|-------------------------------|-------|------|----------------------------------|
|                   |                         | Est.   | SE   | P-value<br>for<br>main<br>effect | Est.  | SE   | P-value<br>for main<br>effect | Est.  | SE   | P-value<br>for<br>main<br>effect |
| Intercept         |                         | -0.27  | 0.18 |                                  | -3.87 | 0.21 |                               | -4.98 | 0.50 |                                  |
| Pair              | 1                       | -0.33  | 0.20 | <0.0001                          |       |      |                               |       |      |                                  |
|                   | 2                       | -0.16  | 0.18 |                                  |       |      |                               |       |      |                                  |
|                   | 3                       | 1.00   | 0.22 |                                  |       |      |                               |       |      |                                  |
|                   | 4                       | -0.30  | 0.19 |                                  |       |      |                               |       |      |                                  |
|                   | 5                       | 0.06   | 0.19 |                                  |       |      |                               |       |      |                                  |
|                   | 6                       | -0.23  | 0.18 |                                  |       |      |                               | 0.99  | 0.43 | 0.01                             |
|                   | 7                       | 0.00   |      |                                  |       |      |                               | 0.00  |      |                                  |
|                   | 11                      | -0.02  | 0.19 |                                  |       |      |                               | 1.18  | 0.43 |                                  |
|                   | 12                      | -0.03  | 0.22 |                                  |       |      |                               | 0.76  | 0.57 |                                  |
|                   | 14                      | 0.06   | 0.21 |                                  |       |      |                               | -0.22 | 0.60 |                                  |
|                   | 15                      | -0.56  | 0.23 |                                  |       |      |                               | 0.57  | 0.53 |                                  |
|                   | 16                      | -0.45  | 0.27 |                                  |       |      |                               | 1.42  | 0.63 |                                  |
|                   | 17                      | -0.91  | 0.33 |                                  |       |      |                               | 0.73  | 0.86 |                                  |
|                   | 18                      | -0.67  | 0.23 |                                  |       |      |                               | 1.21  | 0.50 |                                  |
|                   | 19                      | 0.35   | 0.21 |                                  |       |      |                               | 1.45  | 0.44 |                                  |
|                   | 20                      | -0.09  | 0.21 |                                  |       |      |                               | 1.15  | 0.50 |                                  |
| Housing<br>system | Compost-<br>bedded pack | -0.22  | 0.07 | <0.01                            | -0.21 | 0.15 | 0.16                          | 0.47  | 0.17 | <0.01                            |
|                   | Cubicle                 | 0.00   |      |                                  | 0.00  |      |                               | 0.00  |      |                                  |
| Parity            | 1                       | -0.22  | 0.07 | <0.01                            | 0.29  | 0.17 | 0.15                          | 0.52  | 0.19 | <0.01                            |

|                 |          |      |      |      |      |       |      |        |       |      |        |
|-----------------|----------|------|------|------|------|-------|------|--------|-------|------|--------|
| Breed           | Holstein | 2    | 0.00 | .    |      | -0.02 | 0.19 |        | -0.28 | 0.25 |        |
|                 |          | ≥3   | 0.17 | 0.10 |      | 0.00  | .    |        | 0.00  | .    |        |
|                 |          |      | 0.00 | .    | 0.1  | 0.62  | 0.18 | <0.001 | 0.92  | 0.28 | <0.001 |
| Year of calving | Other    |      |      |      |      | 0.00  | .    |        | 0.00  | .    |        |
|                 |          | 2017 | 0.05 | 0.07 | 0.44 | 0.16  | 0.15 | 0.26   | -0.14 | 0.17 | 0.4    |
|                 |          | 2018 | 0.00 | .    |      | 0.00  | .    |        | 0.00  | .    |        |

---

Table S3. Parameter estimates (Est.) with standard errors (SE) and overall significance tests of main effects from multivariable linear regression models of culling and culling-related issues (length of life, length of productive life, parity at culling).

| Effect    | Length of life |         |                                  | Productive life |         |                               | Parity at culling |      |                                  |         |
|-----------|----------------|---------|----------------------------------|-----------------|---------|-------------------------------|-------------------|------|----------------------------------|---------|
|           | Est.           | SE      | P-value<br>for<br>main<br>effect | Est.            | SE      | P-value<br>for main<br>effect | Est.              | SE   | P-value<br>for<br>main<br>effect |         |
| Intercept | 1465.10        | 111.27  |                                  | 636.26          | 98.53   |                               | 2.53              | 0.26 |                                  |         |
| Pair      | 1              | 259.67  | 113.82                           | <0.0001         | 380.91  | 98.08                         | <0.0001           | 0.49 | 0.27                             | <0.0001 |
|           | 2              | 1110.09 | 131.85                           |                 | 1244.31 | 114.21                        |                   | 2.50 | 0.31                             |         |
|           | 3              | 430.44  | 112.81                           |                 | 532.19  | 97.12                         |                   | 0.23 | 0.27                             |         |
|           | 4              | 711.80  | 106.43                           |                 | 820.87  | 91.51                         |                   | 1.48 | 0.25                             |         |
|           | 5              | 492.60  | 117.73                           |                 | 539.85  | 103.11                        |                   | 0.88 | 0.28                             |         |
|           | 6              | 146.45  | 111.83                           |                 | 174.61  | 94.12                         |                   | 0.14 | 0.27                             |         |
|           | 7              | 0.00    |                                  |                 | 0.00    |                               |                   | 0.00 |                                  |         |
|           | 11             | 229.60  | 104.69                           |                 | 252.04  | 88.70                         |                   | 0.45 | 0.25                             |         |
|           | 12             | 1234.31 | 155.89                           |                 | 233.65  | 166.36                        |                   | 2.03 | 0.37                             |         |
|           | 14             | 544.00  | 116.91                           |                 | 248.98  | 107.82                        |                   | 1.11 | 0.28                             |         |
|           | 15             | 418.48  | 130.47                           |                 | 347.03  | 117.90                        |                   | 0.89 | 0.31                             |         |
|           | 16             | 1020.73 | 194.74                           |                 | 485.74  | 198.24                        |                   | 2.24 | 0.46                             |         |
|           | 17             | 996.28  | 242.79                           |                 | 131.55  | 287.61                        |                   | 2.30 | 0.58                             |         |
|           | 18             | 429.80  | 137.79                           |                 | 153.19  | 129.33                        |                   | 0.68 | 0.33                             |         |

|                 |                     |         |         |        |         |        |        |         |        |      |
|-----------------|---------------------|---------|---------|--------|---------|--------|--------|---------|--------|------|
|                 |                     | 19      | 442.80  | 120.46 |         | 248.48 | 109.95 |         | 0.81   | 0.29 |
|                 |                     | 20      | 271.88  | 117.33 |         | 160.66 | 105.49 |         | 0.21   | 0.28 |
| Housing system  | Compost-bedded pack | 18.23   | 50.10   | 0.72   | 0.21    | 45.68  | 1      | -0.14   | 0.12   | 0.26 |
|                 | Cubicle             | 0.00    | .       |        | 0.00    | .      |        | 0.00    | .      |      |
| Breed           | Holstein            | 100.40  | 83.51   | 0.23   | 100.30  | 76.78  | 0.19   | 0.07    | 0.20   | 0.71 |
|                 | Other               | 0.00    | .       |        | 0.00    | .      |        | 0.00    | .      |      |
| Year of culling | 2017                | 10.5815 | 48.2626 | 0.82   | -       | 43.957 | 0.18   | 0.03829 | 0.1148 | 0.74 |
|                 |                     |         |         |        | 59.3316 |        |        |         |        |      |
|                 | 2018                | 0       | .       |        | 0       | .      |        | 0       | .      |      |

---

Table S4. Parameter estimates (Est.) with standard errors (SE) and overall significance tests of main effects from multivariable (mixed) regression models of culling and culling-related issues (first calving risk, calf mortality).

| Effect    | % 1st calvers |      |                                  | Calf mortality |      |                                  |
|-----------|---------------|------|----------------------------------|----------------|------|----------------------------------|
|           | Est.          | SE   | P-value<br>for<br>main<br>effect | Est.           | SE   | P-value<br>for<br>main<br>effect |
| Intercept | -0.38         | 0.15 |                                  | -3.42          | 0.42 |                                  |
| Pair      | 1 -0.29       | 0.16 | <0.0001                          | 0.44           | 0.45 | <0.0001                          |
|           | 2 -0.46       | 0.15 |                                  | 0.68           | 0.42 |                                  |
|           | 3 -0.31       | 0.18 |                                  | 0.50           | 0.46 |                                  |
|           | 4 -0.57       | 0.16 |                                  | 0.23           | 0.45 |                                  |
|           | 5 -0.40       | 0.16 |                                  | 1.13           | 0.42 |                                  |
|           | 6 -0.27       | 0.15 |                                  | 0.55           | 0.46 |                                  |
|           | 7 0.00        |      |                                  | 0.00           |      |                                  |
|           | 11 -0.22      | 0.15 |                                  | -0.22          | 0.51 |                                  |
|           | 12 -0.64      | 0.19 |                                  | -15.13         | 0.00 |                                  |
|           | 14 -0.57      | 0.18 |                                  | -15.20         | 0.00 |                                  |
|           | 15 -0.42      | 0.19 |                                  | -15.19         | 0.00 |                                  |
|           | 16 -0.86      | 0.24 |                                  | 0.54           | 0.53 |                                  |
|           | 17 -0.63      | 0.26 |                                  | -0.19          | 0.71 |                                  |
|           | 18 -0.51      | 0.19 |                                  | 1.07           | 0.44 |                                  |



|                 |                     |         |         |       |         |        |      |
|-----------------|---------------------|---------|---------|-------|---------|--------|------|
|                 |                     | 19      | -0.12   | 0.17  |         | -15.24 | 0.00 |
|                 |                     | 20      | 0.00    | 0.16  |         | -0.45  | 0.52 |
| Housing system  | Compost-bedded pack | -0.18   | 0.06    | 0.003 | 0.10    | 0.14   | 0.49 |
|                 | Cubicle             | 0.00    | .       |       | 0.00    | .      |      |
| Breed           | Holstein            | -0.07   | 0.09    | 0.45  | 0.15    | 0.15   | 0.33 |
|                 | Other               | 0.00    | .       |       | 0.00    | .      |      |
| Year of culling | 2017                | -0.1041 | 0.05865 | 0.08  | -0.1806 | 0.1377 | 0.19 |
|                 | 2018                | 0       | .       |       | 0       | .      |      |

---
